# Supplementary material
Source: PubMed Central journal article supplement (PMC4446872)
Supplement: ASN.2014030304_ASN2014030304SupplementaryData.pdf [file ASN.2014030304_ASN2014030304SupplementaryData.pdf]

**Supplemental Table 1.** Blood pressure medication use in the hypertensive donor group.

| <b>Subject</b> | <b>Pre-donation Medication</b>    | <b>Post-donation Medication</b>   |
|----------------|-----------------------------------|-----------------------------------|
| <b>H1</b>      |                                   | Lisinopril 2.5 mg daily           |
| <b>H2</b>      |                                   |                                   |
| <b>H3</b>      | Telmisartan/HCTZ 40/12.5 mg daily | Telmisartan/HCTZ 40/12.5 mg daily |
| <b>H4</b>      | Amlodipine 5 mg daily             | Amlodipine 5 mg daily             |
| <b>H5</b>      |                                   |                                   |
| <b>H6</b>      | Valsartan 80 mg daily             | Valsartan 80 mg daily             |
| <b>H7</b>      | Metoprolol XL 150 mg daily        | Metoprolol XL 150 mg daily        |
| <b>H8</b>      | Valsartan 80 mg daily             | Valsartan 80 mg daily             |
| <b>H9</b>      | Losartan 50 mg daily              | Losartan 50 mg daily              |
| <b>H10</b>     | Irbesartan/HCTZ 150/12.5 mg daily | Amlodipine 5 mg daily             |

HCTZ = hydrochlorothiazide
